# Supplementary material for: How Does Advertising Depend on Competition? Evidence from U.S. Brewing
Source: Atypon-hosted journal article supplement (doi:10.1287/mnsc.2017.2889), 2018-01-16
Supplement: mnsc.2017.2889-sm.pdf [file mnsc.2017.2889-sm.pdf]

# A Online Appendix for Chandra and Weinberg, “How Does Advertising Depend on Competition? Evidence from U.S. Brewing”, *Management Science*, Forthcoming

Figure 5: Scatter Plot of Market sizes and Advertising Expenditures, 2008

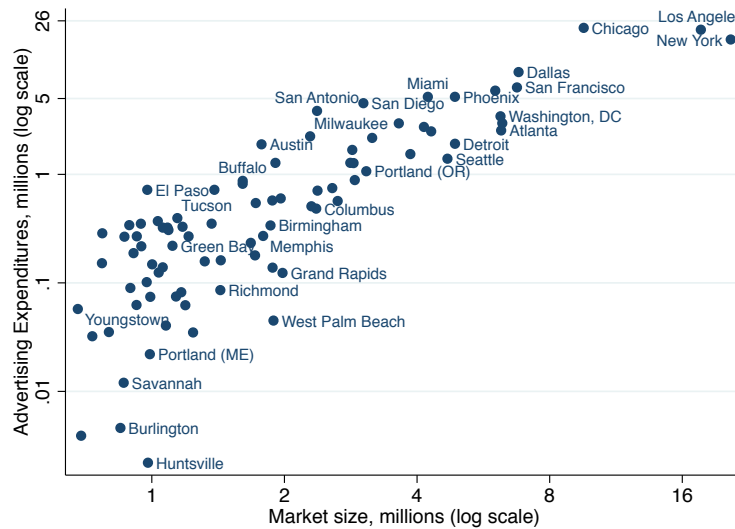

*Notes:* Market sizes are based on Nielsen media markets. Advertising Expenditures are from Kantar, representing aggregate local advertising across all beer brands in 2008. Each city corresponds to an agglomeration of counties that comprises a region in the Nielsen scanner data. Population figures for these counties is derived from the U.S. census.

Figure 6: Aggregate Soda and Beer Advertising, Quarterly, 2007–2012

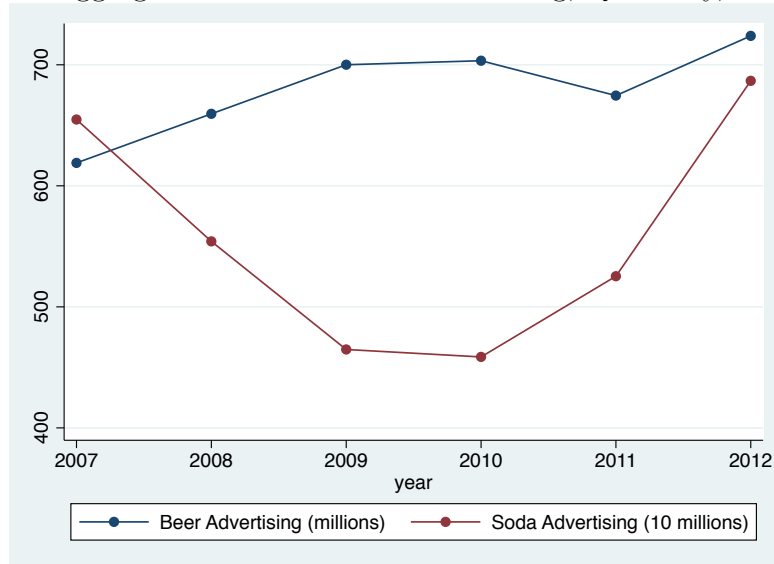

Notes: Advertising Expenditures are from Kantar, and represent aggregate advertising, across all manufacturers, in national media for beer and soda.

Table 11: OLS Estimates of Advertising on Concentration: Annual Data

|                          | (1)            | (2)            | (3)              |
|--------------------------|----------------|----------------|------------------|
| HHI                      | 1.06<br>(1.79) | 1.06<br>(1.91) | 3.69**<br>(1.70) |
| Firm*Market Effects      | No             | Yes            | Yes              |
| Firm*Date Effects        | No             | Yes            | No               |
| Census Region*Time Trend | No             | No             | Yes              |
| R <sup>2</sup>           | 0.436          | 0.835          | 0.829            |
| Obs                      | 3045           | 3045           | 3045             |

Notes: \*  $p < 0.1$ , \*\*  $p < 0.05$ , \*\*\*  $p < 0.01$ . Columns 1 and 4 also contain uninteracted firm, date and market fixed-effects. Column 3 also contains date fixed-effects. Standard errors clustered by market are in parentheses.

Table 12: Effect of Merger on Market Concentration (First-Stage): Annual Data

|                                              | (1)               | (2)               | (3)               |
|----------------------------------------------|-------------------|-------------------|-------------------|
| <i>sim</i> $\Delta$ <i>HHI</i> * <i>Post</i> | 1.18***<br>(0.26) | 1.18***<br>(0.28) | 1.12***<br>(0.18) |
| Firm*Market Effects                          | No                | Yes               | Yes               |
| Firm*Date Effects                            | No                | Yes               | No                |
| Census Region*Time Trend                     | No                | No                | Yes               |
| R <sup>2</sup>                               | 0.834             | 0.834             | 0.845             |
| Obs                                          | 3045              | 3045              | 3045              |

Notes: \*  $p < 0.1$ , \*\*  $p < 0.05$ , \*\*\*  $p < 0.01$ . Columns 1 and 4 also contain uninteracted firm, date and market fixed-effects. Column 3 also contains date fixed-effects. Standard errors clustered by market are in parentheses.

Table 13: Effect of Merger on Advertising (Reduced-Form): Annual Data

|                                              | (1)                | (2)                | (3)                |
|----------------------------------------------|--------------------|--------------------|--------------------|
| <i>sim</i> $\Delta$ <i>HHI</i> * <i>Post</i> | 36.79**<br>(16.81) | 36.79**<br>(17.98) | 46.53**<br>(22.67) |
| Firm*Market Effects                          | No                 | Yes                | Yes                |
| Firm*Date Effects                            | No                 | Yes                | No                 |
| Census Region*Time Trend                     | No                 | No                 | Yes                |
| R <sup>2</sup>                               | 0.437              | 0.835              | 0.829              |
| Obs                                          | 3045               | 3045               | 3045               |

Notes: \*  $p < 0.1$ , \*\*  $p < 0.05$ , \*\*\*  $p < 0.01$ . Columns 1 and 4 also contain uninteracted firm, date and market fixed-effects. Column 3 also contains date fixed-effects. Standard errors clustered by market are in parentheses.

Table 14: Effect of Concentration on Advertising (IV): Annual Data

|                          | (1)                | (2)                | (3)                |
|--------------------------|--------------------|--------------------|--------------------|
| HHI                      | 31.12**<br>(15.64) | 31.12**<br>(15.31) | 41.65**<br>(19.10) |
| Firm*Market Effects      | No                 | Yes                | Yes                |
| Firm*Date Effects        | No                 | Yes                | No                 |
| Census Region*Time Trend | No                 | No                 | Yes                |
| Obs                      | 3045               | 3045               | 3045               |

Notes: \*  $p < 0.1$ , \*\*  $p < 0.05$ , \*\*\*  $p < 0.01$ . Column 1 also contains uninteracted firm, date and market fixed-effects. Column 3 also contains date fixed-effects. Standard errors clustered by market are in parentheses.

Table 15: Effect of Merger on Advertising (Reduced-Form): Three-Period Model

|                            | Monthly           |                   | Pre/Post          |                  |
|----------------------------|-------------------|-------------------|-------------------|------------------|
|                            | (1)               | (2)               | (3)               | (4)              |
| $sim\Delta HHI * Announce$ | 2.06<br>(14.74)   | 2.06<br>(14.88)   | 2.18<br>(15.25)   | 2.18<br>(18.14)  |
| $sim\Delta HHI * Post$     | 28.55*<br>(14.45) | 28.55*<br>(14.58) | 29.00*<br>(15.02) | 29.00<br>(17.87) |
| Firm*Market Effects        | No                | Yes               | No                | Yes              |
| Firm*Date Effects          | No                | Yes               | No                | Yes              |
| R <sup>2</sup>             | 0.357             | 0.586             | 0.498             | 0.920            |
| Obs                        | 36540             | 36540             | 1305              | 1305             |

Notes: \*  $p < 0.1$ , \*\*  $p < 0.05$ . Columns 1 and 3 also contain uninteracted firm, date and market fixed-effects. Standard errors clustered by market are in parentheses.

Table 16: Regressions of Per-Capita Television Advertising

|                                       | OLS            | Reduced-form       | IV                 |
|---------------------------------------|----------------|--------------------|--------------------|
| HHI                                   | 0.94<br>(1.40) |                    | 24.42**<br>(12.01) |
| <i>sim</i> $\Delta$ HHI * <i>Post</i> |                | 22.62**<br>(10.06) |                    |
| $R^2$                                 | 0.514          | 0.514              | 0.352              |
| Obs                                   | 36540          | 36540              | 36540              |

Notes: \*  $p < 0.1$ , \*\*  $p < 0.05$ . Standard errors clustered by market are in parentheses. Regressions include firm\*market and year\*month fixed-effects.

Table 17: Lagged values of HHI

|                    | (1)            | (2)            | (3)            | (4)             |
|--------------------|----------------|----------------|----------------|-----------------|
| HHI <sub>t</sub>   | 2.34<br>(1.50) |                |                |                 |
| HHI <sub>t-1</sub> |                | 2.06<br>(1.45) |                |                 |
| HHI <sub>t-3</sub> |                |                | 0.93<br>(1.60) |                 |
| HHI <sub>t-6</sub> |                |                |                | -0.69<br>(1.69) |
| $R^2$              | 0.566          | 0.569          | 0.572          | 0.573           |
| Obs                | 36540          | 36105          | 35235          | 33930           |

Notes: \*  $p < 0.1$ , \*\*  $p < 0.05$ , \*\*\*  $p < 0.01$ . Standard errors clustered by market are in parentheses. Regressions include firm\*market and year\*month fixed-effects.

Table 18: Predicted and Actual Changes in HHI: Outliers

| City       | Change in HHI |                |                |
|------------|---------------|----------------|----------------|
|            | Predicted     | Actual 2007–09 | Actual 2007–10 |
| St Louis   | 67            | -122           | -146           |
| Milwaukee  | 297           | 233            | 167            |
| Knoxville  | 299           | 119            | -1             |
| Charleston | 331           | 134            | 127            |
| Lexington  | 351           | 151            | 86             |
| Paducah    | 576           | 933            | 772            |
| Spokane    | 591           | 1082           | 1006           |

Notes: The Table compares predicted and actual changes in HHI for a selection of outlier cities. HHI is measured on a 10,000 point scale.
